# Supplementary material for: Functional connectivity correlates of reduced goal-directed behaviors in behavioural variant frontotemporal dementia
Source: PubMed Central journal article supplement (PMC9653340; doi:10.1007/s00429-022-02519-5), 2022-06-25
Supplement: 429_2022_2519_MOESM2_ESM.pdf [file 429_2022_2519_MOESM2_ESM.pdf]

## Supplementary file 2

### Results of Shapiro normality tests for ANOVA testing the effects of group and phase on behavioral metrics

#### A/ Normality tests on *Activity time ratio* in each group x phase condition

- Before removing 3 extreme outliers

| Group            | Phase  | Statistic (W) | p-value |
|------------------|--------|---------------|---------|
| bvFTD patients   | Free   | .94           | .22     |
| healthy controls | Free   | .77           | .001    |
| bvFTD patients   | Guided | .83           | .003    |
| healthy controls | Guided | .51           | < .001  |

- After removing 3 extreme outliers

| Group            | Phase  | Statistic (W) | p-value |
|------------------|--------|---------------|---------|
| bvFTD patients   | Free   | .94           | .22     |
| healthy controls | Free   | .79           | .003    |
| bvFTD patients   | Guided | .83           | .003    |
| healthy controls | Guided | .90           | .10     |

#### B/ Normality tests on *Walking occurrences* in each group x phase condition

(No detected extreme outliers)

| Group            | Phase  | Statistic (W) | p-value |
|------------------|--------|---------------|---------|
| bvFTD patients   | Free   | .90           | .05     |
| healthy controls | Free   | .86           | .02     |
| bvFTD patients   | Guided | .86           | .007    |
| healthy controls | Guided | .97           | .836    |

### **C/ Normality tests on *Walking acceleration* in each group x phase condition**

- Before removing 2 extreme outliers

| Group            | Phase  | Statistic (W) | <i>p</i> -value |
|------------------|--------|---------------|-----------------|
| bvFTD patients   | Free   | .93           | .16             |
| healthy controls | Free   | .92           | .22             |
| bvFTD patients   | Guided | .96           | .51             |
| healthy controls | Guided | .75           | .001            |

- After removing 2 extreme outliers

| Group            | Phase  | Statistic (W) | <i>p</i> -value |
|------------------|--------|---------------|-----------------|
| bvFTD patients   | Free   | .96           | .62             |
| healthy controls | Free   | .92           | .23             |
| bvFTD patients   | Guided | .96           | .51             |
| healthy controls | Guided | .92           | .26             |

### **D/ Normality tests on *Walking duration* in each group x phase condition**

- Before removing 1 extreme outlier

| Group            | Phase  | Statistic (W) | <i>p</i> -value |
|------------------|--------|---------------|-----------------|
| bvFTD patients   | Free   | .93           | .18             |
| healthy controls | Free   | .84           | .01             |
| bvFTD patients   | Guided | .93           | .16             |
| healthy controls | Guided | .96           | .64             |

- After removing 1 extreme outlier

| Group            | Phase  | Statistic (W) | <i>p</i> -value |
|------------------|--------|---------------|-----------------|
| bvFTD patients   | Free   | .93           | .18             |
| healthy controls | Free   | .93           | .30             |
| bvFTD patients   | Guided | .93           | .16             |
| healthy controls | Guided | .96           | .64             |
